# Supplementary material for: Novel two-photon absorption compounds with different organic cations: facile synthesis, photophysical properties, detection of viscosity, and selective imaging of the endoplasmic reticulum in living cells
Source: Royal Society of Chemistry journal article supplement (doi:10.1039/d2an01207c), 2022-01-01
Supplement: d2an01207c1.pdf [file d2an01207c1.pdf]

## Supporting information

**Novel two-photon absorption compounds with different organic cations:  
Facile synthesis, photophysical properties, detection of viscosity, and  
selective imaging of the endoplasmic reticulum in living cells**

**Zhi-Bin Cai<sup>a,\*</sup>, Qiao-Xian Lou<sup>a</sup>, Sheng-Li Li<sup>b</sup>, Li-Jun Chen<sup>a</sup>, Qing Ye<sup>a</sup>, Yu-Peng Tian<sup>b</sup>**

<sup>a</sup> College of Chemical Engineering, Zhejiang University of Technology, Hangzhou 310014, PR China

<sup>b</sup> Department of Chemistry, Anhui Province Key Laboratory of Functional Inorganic Materials, Anhui University, Hefei 230039, PR China

\* Corresponding author.

E-mail address: caizbmail@126.com (Z.-B. Cai).

## Table of Contents

|                                                    |      |
|----------------------------------------------------|------|
| 1. $^1\text{H}$ NMR spectra (Figure S1-S3).....    | S-3  |
| 2. $^{13}\text{C}$ NMR spectra (Figure S4-S6)..... | S-6  |
| 3. HRMS spectra (Figure S7-S9).....                | S-9  |
| 4. FT-IR spectra (Figure S10-S12).....             | S-12 |

# 1. <sup>1</sup>H NMR spectra

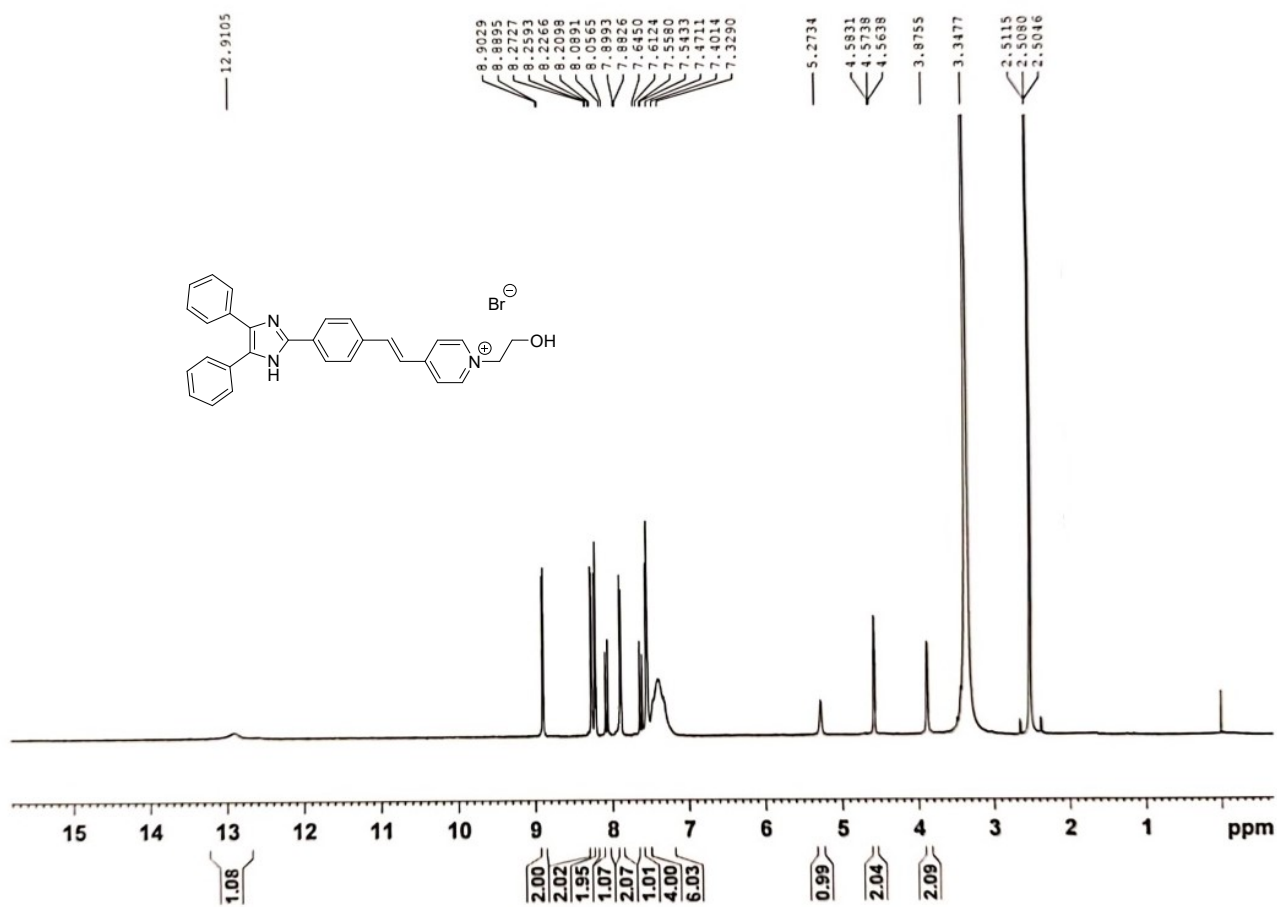

Figure S1. <sup>1</sup>H NMR spectrum of 1PIP in DMSO-*d*<sub>6</sub>.

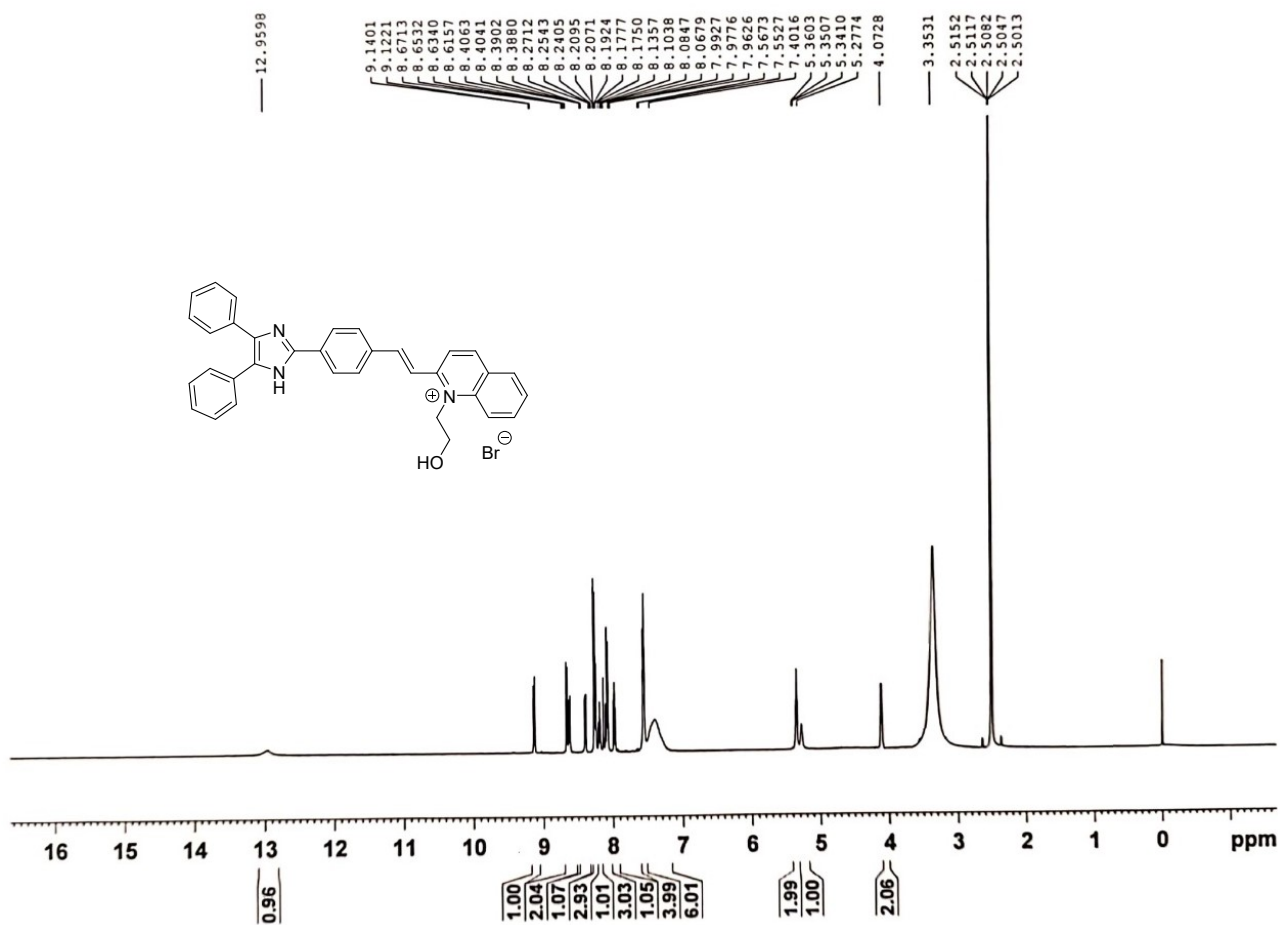

Figure S2. <sup>1</sup>H NMR spectrum of 2PIQu in DMSO-*d*<sub>6</sub>.

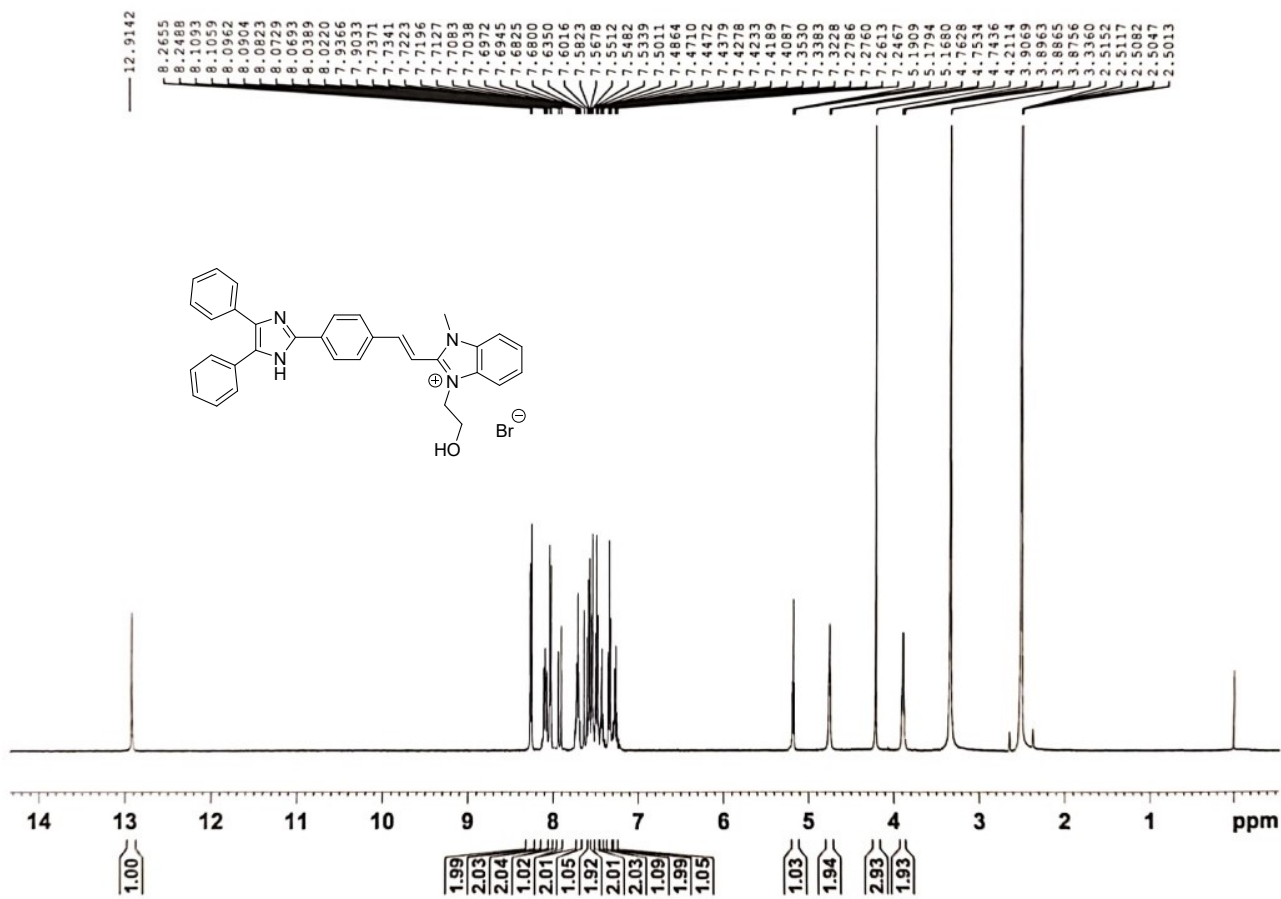

Figure S3. <sup>1</sup>H NMR spectrum of 3PIIm in DMSO-*d*<sub>6</sub>.

## 2. $^{13}\text{C}$ NMR spectra

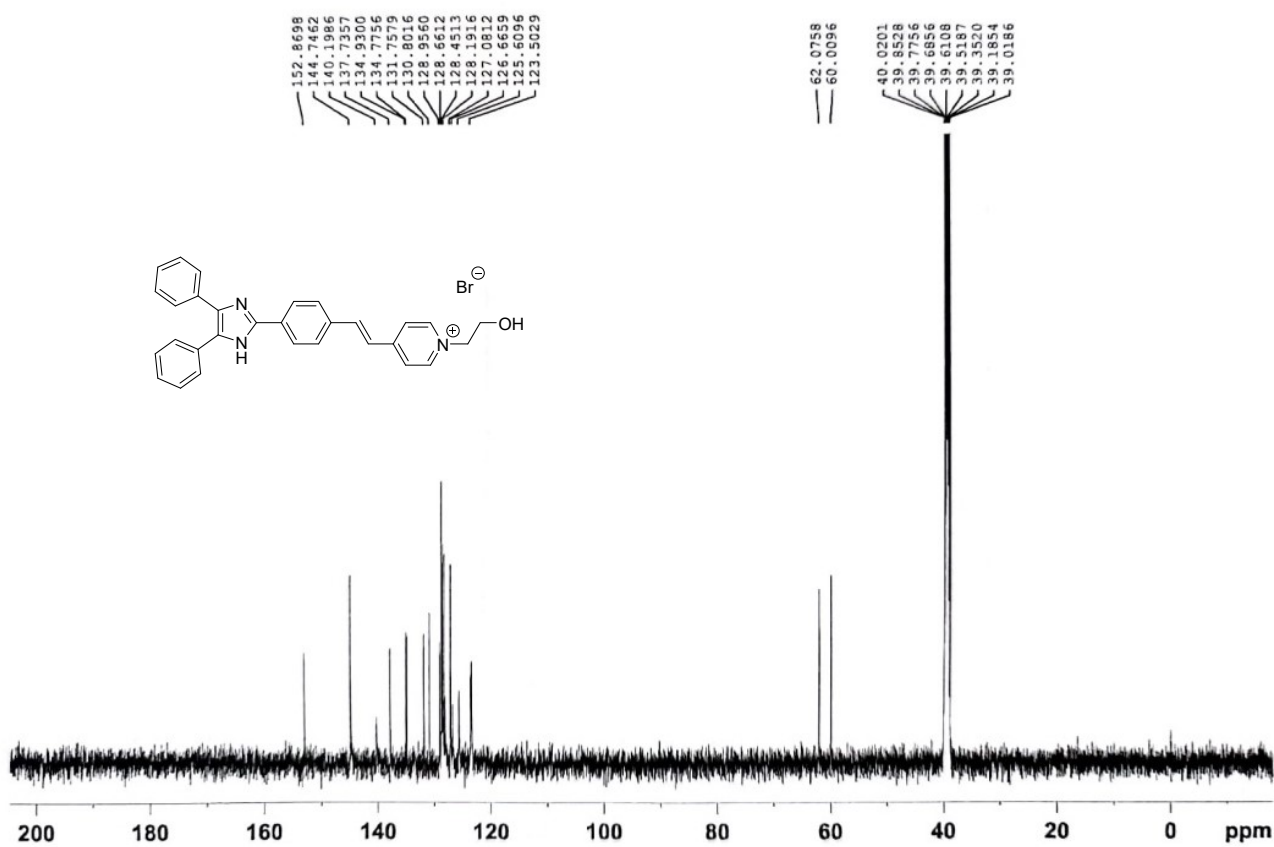

Figure S4.  $^{13}\text{C}$  NMR spectrum of 1PIPy in  $\text{DMSO-}d_6$ .

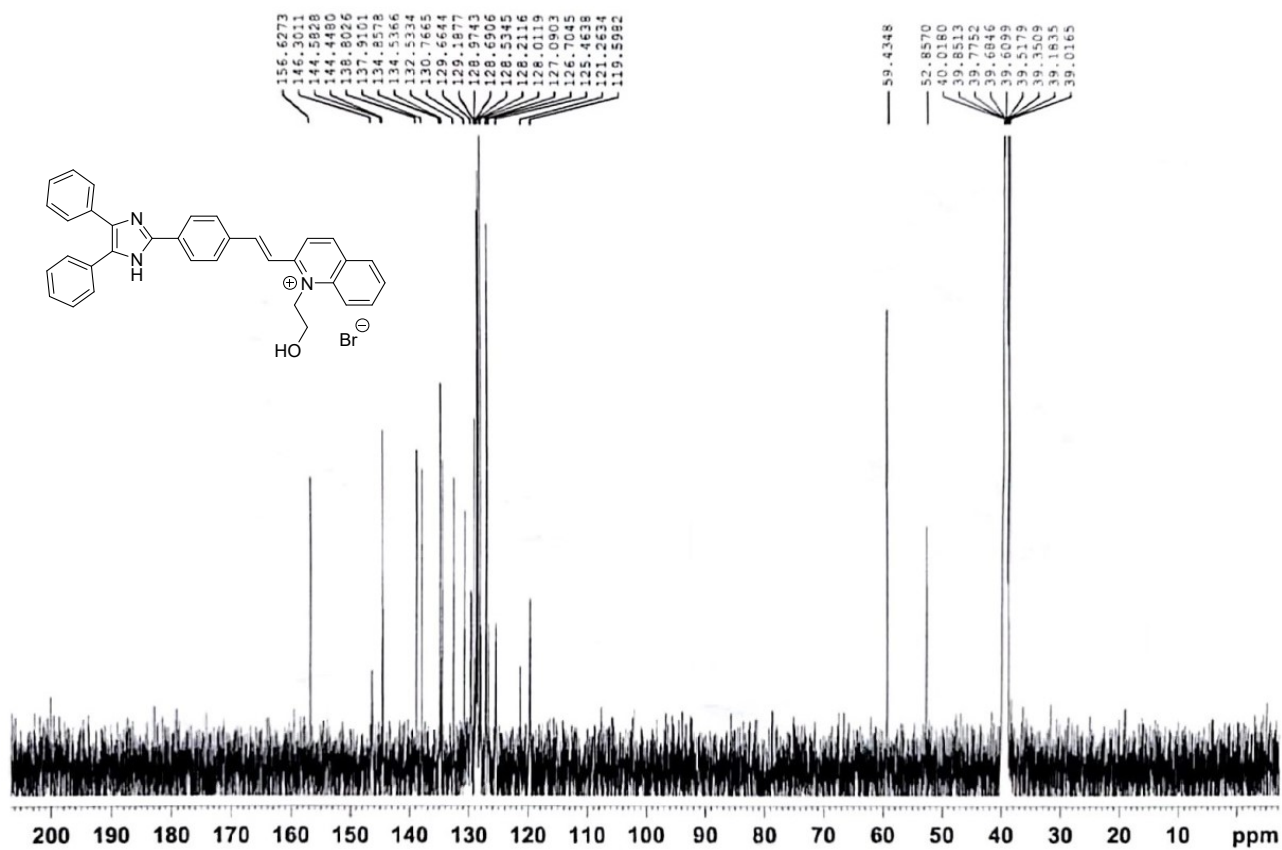

Figure S5. <sup>13</sup>C NMR spectrum of 2PIQu in DMSO-*d*<sub>6</sub>.

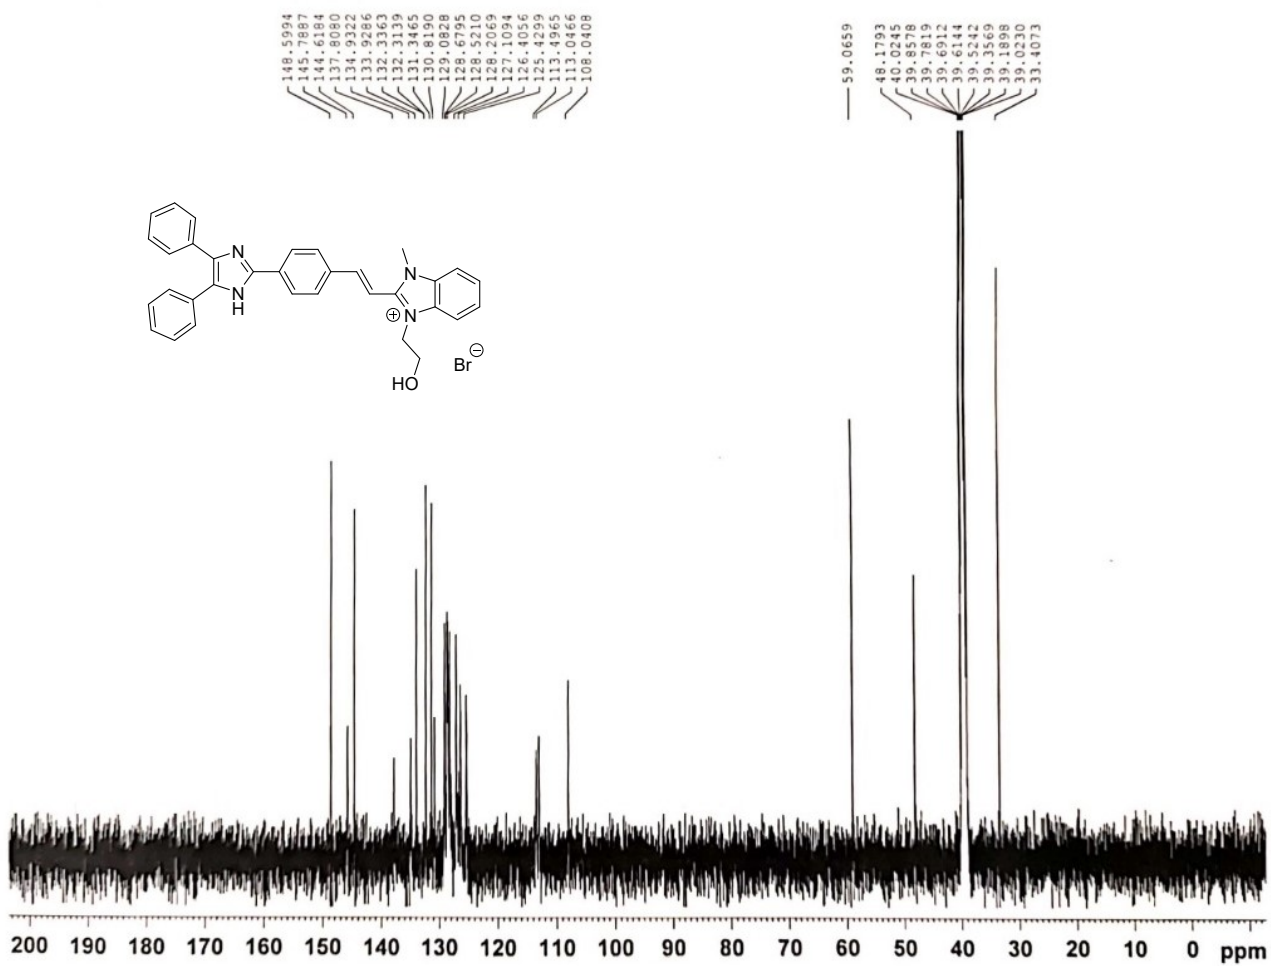

Figure S6. <sup>13</sup>C NMR spectrum of 3PIIm in DMSO-*d*<sub>6</sub>.



### 3. HRMS spectra

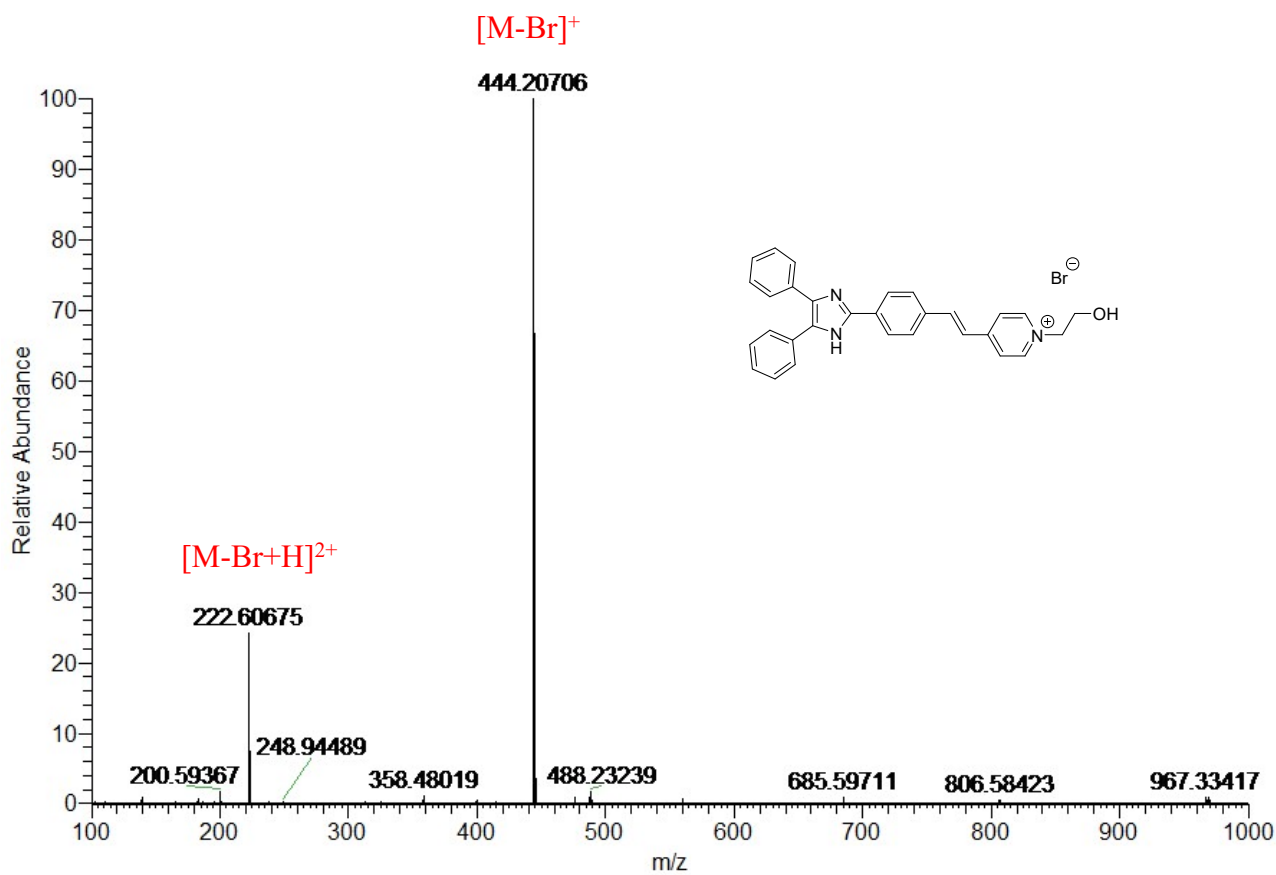

Figure S7. HRMS spectrum of 1PIPy.

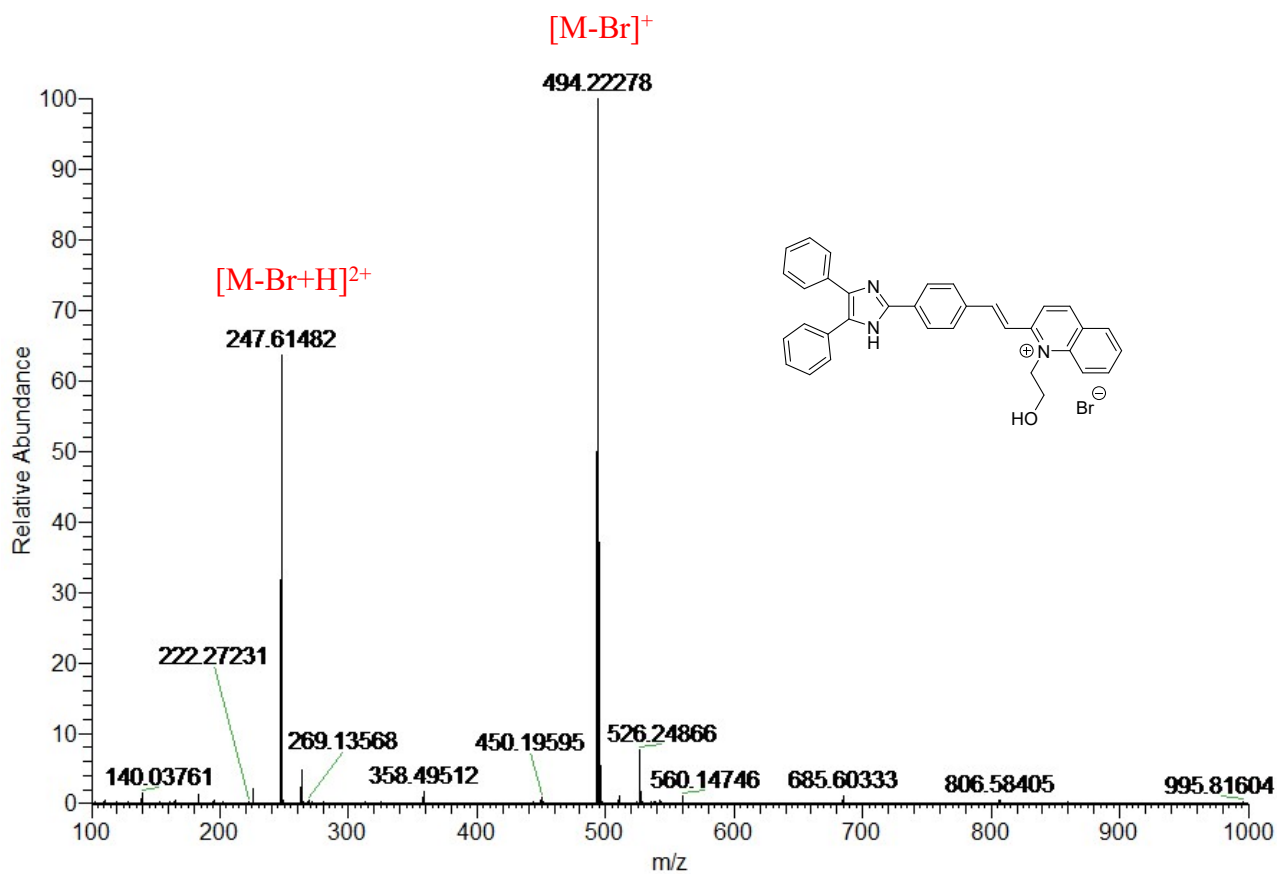

Figure S8. HRMS spectrum of 2PIQu.

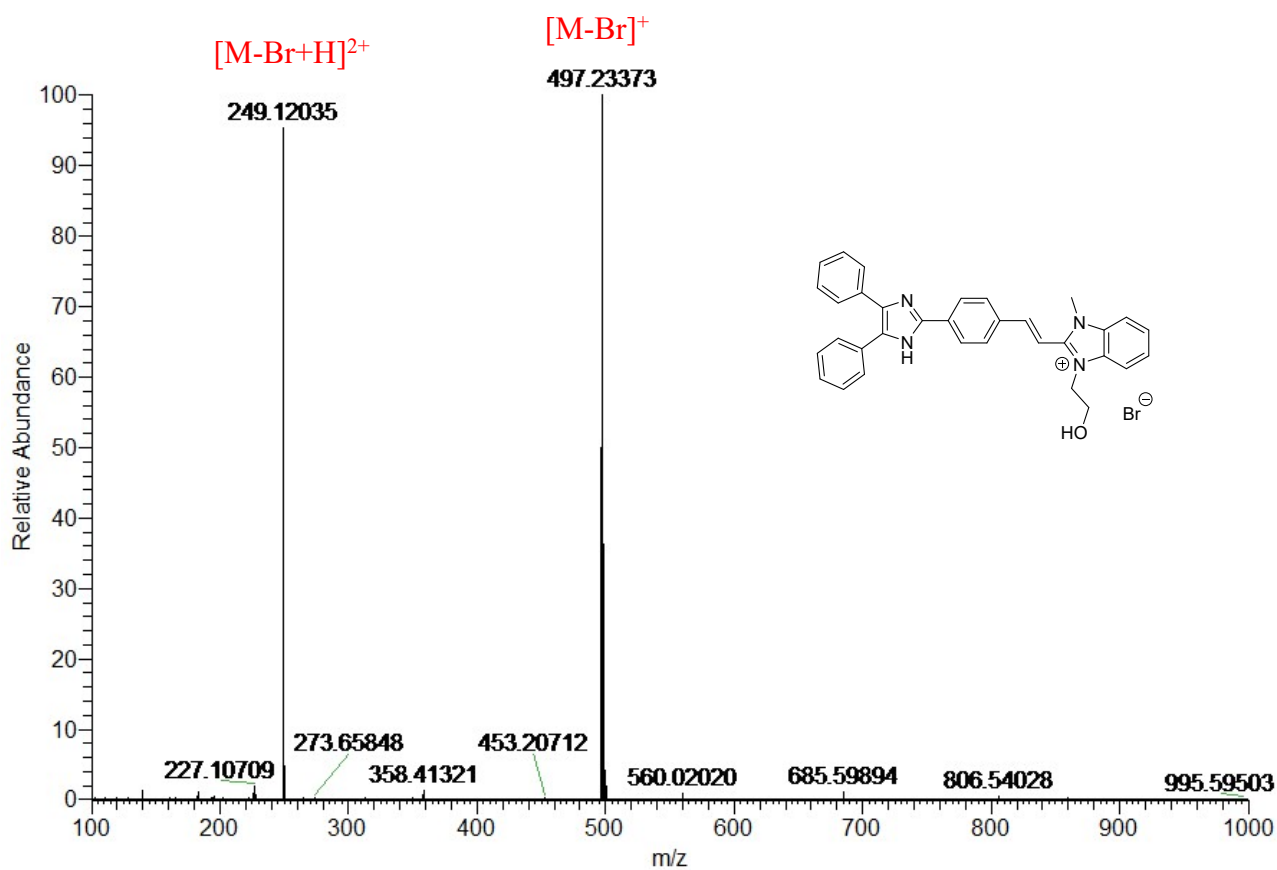

Figure S9. HRMS spectrum of 3PIIm.

#### 4. FT-IR spectra

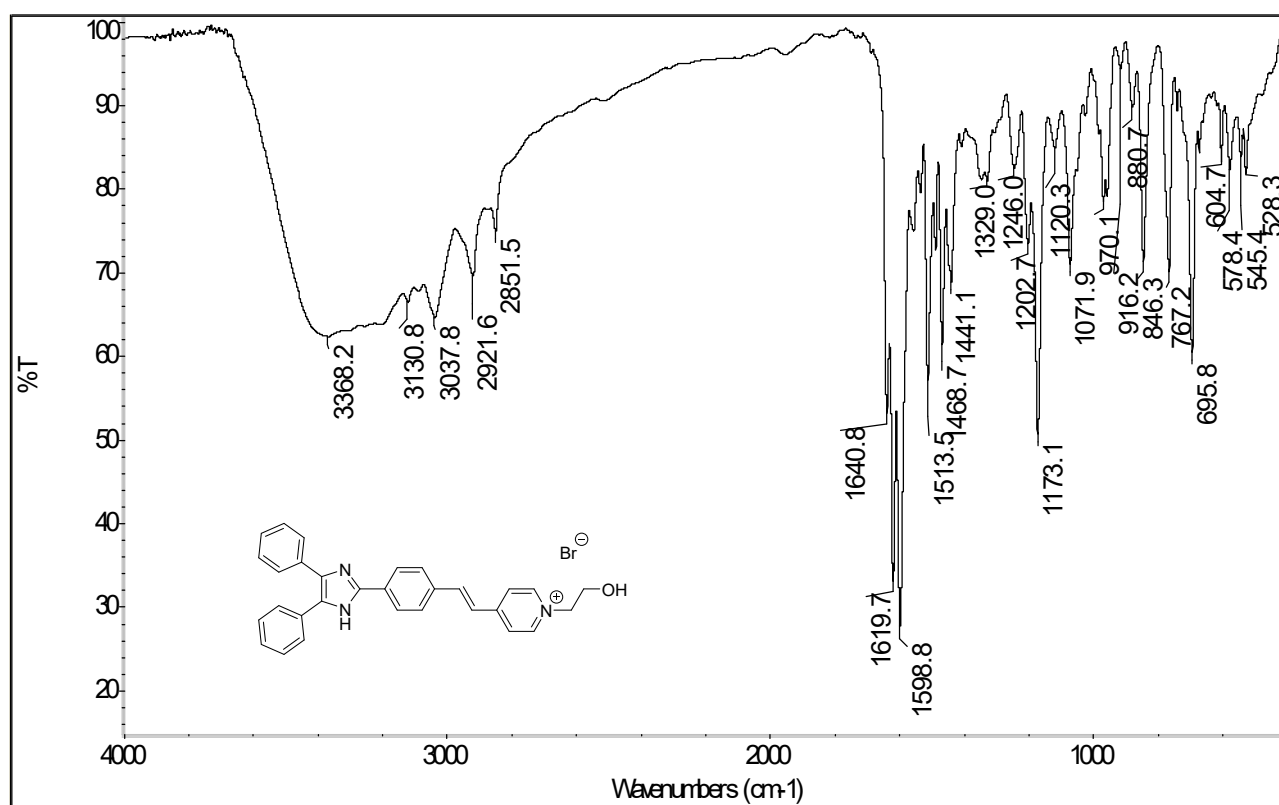

**Figure S10.** FT-IR spectrum of 1PIPyl.

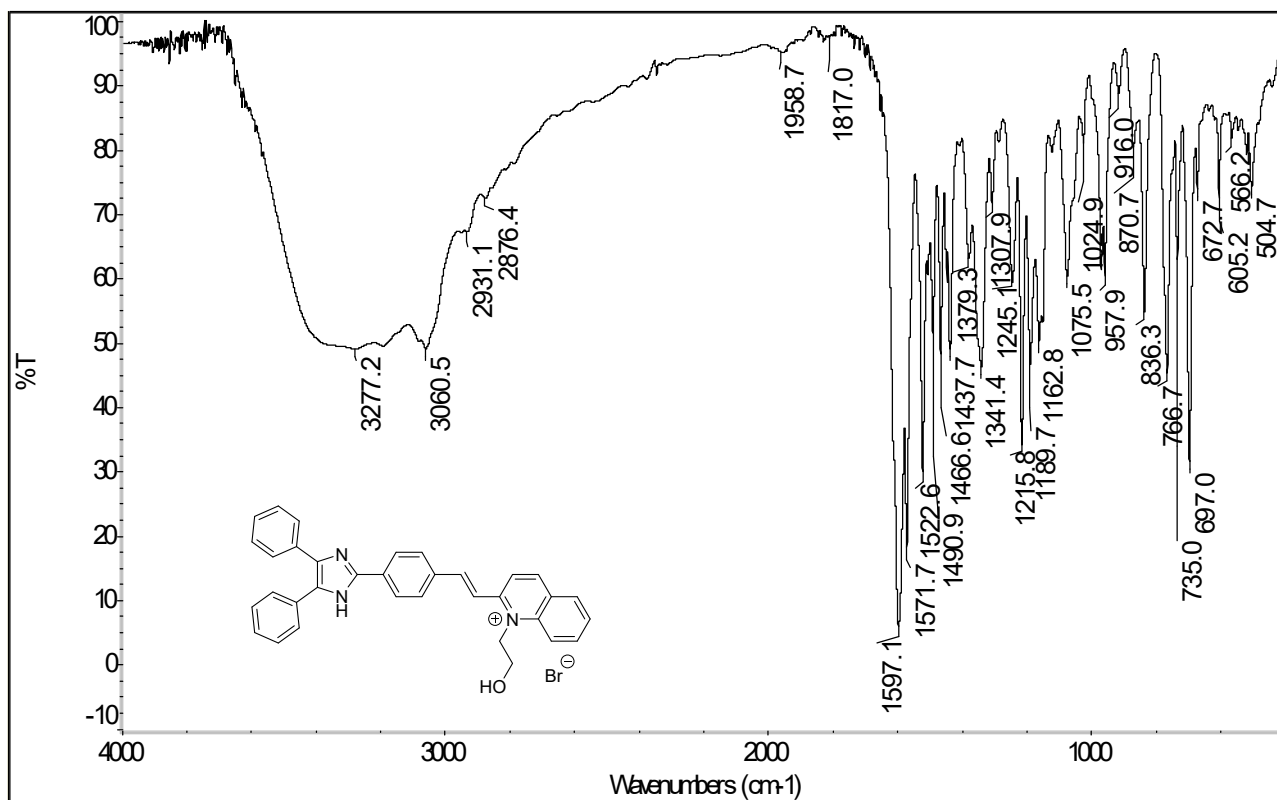

**Figure S11.** FT-IR spectrum of 2PIQu.

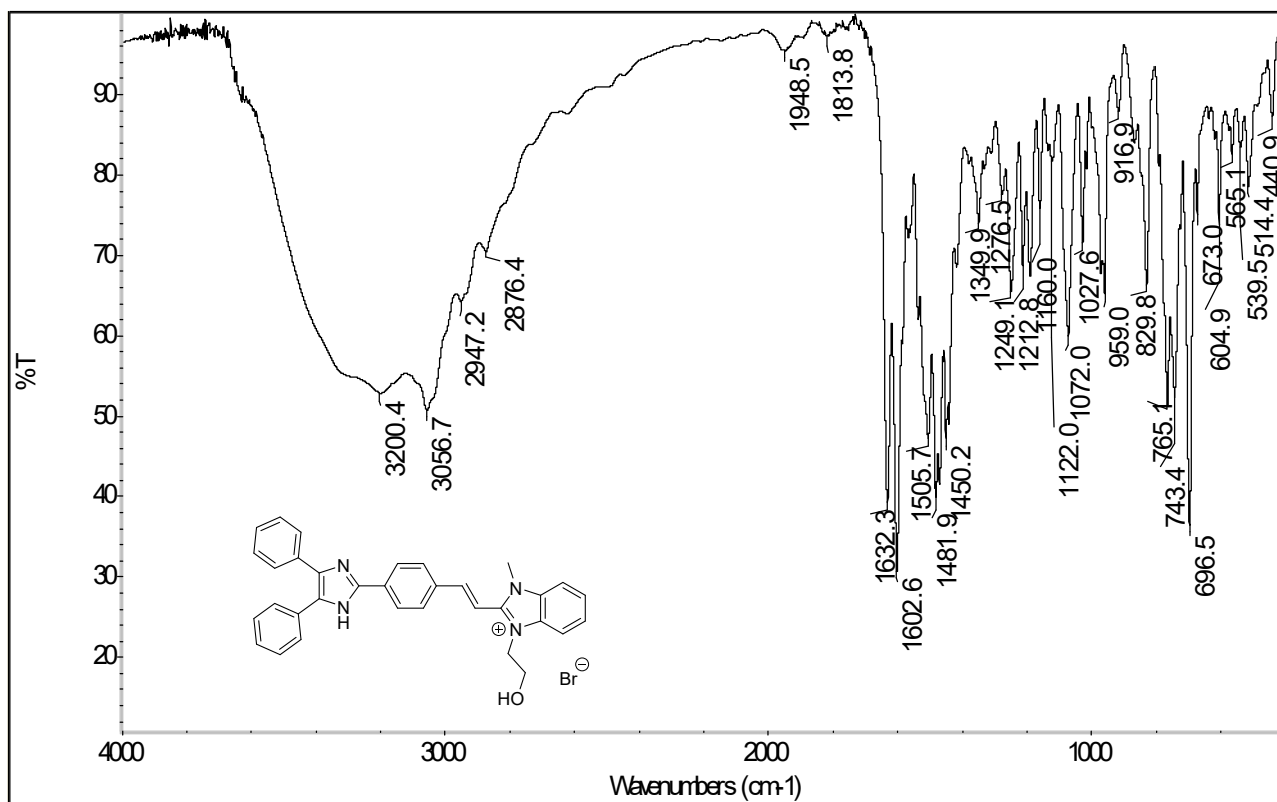

**Figure S12.** FT-IR spectrum of 3PIIm.
